# Supplementary material
Source: Elsevier journal article supplement (https://www.sciencedirect.com/science/article/pii/S0213911115000187)
Supplement: mmc1 [file S0213911115000187:mmc1.docx]

**Apéndice. Material *online***

**Tabla I**

Diferencias sociodemográficas basales entre los participantes seguidos y perdidos durante el seguimiento del estudio dCOT3

|  |  | Muestra final seguida (n=736) | Pérdidas en el seguimiento  (n=274) | p a |
| --- | --- | --- | --- | --- |
| Sexo |  |  |  | 0,249 |
|  | Hombres | 45,6% | 41,6% |  |
|  | Mujeres | 54,4% | 58,4% |  |
| Grupos de edad | |  |  | 0,181 |
|  | ≤44 años | 26,9% | 27,0% |  |
|  | 45-64 años | 36,3% | 30,7% |  |
|  | ≥65 años | 36,8% | 42,3% |  |
| Nivel educativo | |  |  | 0,415 |
|  | Bajo | 38,6% | 40,2% |  |
|  | Medio | 24,5% | 27,1% |  |
|  | Alto | 36,9% | 32,6% |  |
|  |  |  |  |  |

a Test χ2.

**Tabla II**

Percepción de nocividad de los cigarrillos electrónicos en comparación con los cigarrillos convencionales

|  |  | n | Más nocivos | Menos nocivos | Igual de nocivos | No son nocivos | NS/NC | p a |
| --- | --- | --- | --- | --- | --- | --- | --- | --- |
| Todos | | 583 | 1,5 | 47,2 | 14,9 | 13,7 | 22,6 | - |
|  |  |  |  |  |  |  |  |  |
| Sexo | |  |  |  |  |  |  | 0,121 |
|  | Hombres | 274 | 2,6 | 44,5 | 14,2 | 15,7 | 23 |  |
|  | Mujeres | 309 | 0,6 | 49,5 | 15,5 | 12 | 22,3 |  |
| Grupo de edad | |  |  |  |  |  |  | 0,282 |
|  | ≤44 años | 187 | 1,1 | 49,2 | 17,1 | 19,8 | 12,8 |  |
|  | 45-64 años | 240 | 1,7 | 49,6 | 15,4 | 13,8 | 19,6 |  |
|  | ≥65 años | 156 | 1,9 | 41 | 11,5 | 6,4 | 39,1 |  |
| Nivel educativo | |  |  |  |  |  |  | 0,225 |
|  | Bajo | 85 | 2,4 | 37,6 | 15,3 | 17,6 | 27,1 |  |
|  | Medio | 237 | 2,1 | 45,1 | 14,8 | 15,6 | 22,4 |  |
|  | Alto | 261 | 0,8 | 52,1 | 14,9 | 10,7 | 21,5 |  |
| Consumo de tabaco | |  |  |  |  |  |  | 0,035 |
|  | Nunca fumador | 206 | 1 | 48,5 | 18,4 | 11,7 | 20,4 |  |
|  | Ex fumador | 217 | 1,8 | 48,4 | 12,4 | 9,7 | 27,6 |  |
|  | Fumador | 160 | 1,9 | 43,8 | 13,8 | 21,9 | 18,8 |  |
| Dependencia de la nicotinab | |  |  |  |  |  |  | 0,258 |
|  | Baja-media (0-5) | 133 | 1,5 | 40,6 | 14,3 | 24,1 | 19,5 |  |
|  | Alta (6-10) | 27 | 3,7 | 59,3 | 11,1 | 11,1 | 14,8 |  |
|  |  |  |  |  |  |  |  |  |

NS/NC: no sabe/no contesta.

a Test χ2 (no incluye las respuestas NS/NC).

b Dependencia de la nicotina medida por el test de Fagerström.
